# Supplementary material for: Single-molecule magnet involving strong exchange coupling in terbium(iii) complex with 2,2′-bipyridin-6-yl tert-butyl nitroxide
Source: Royal Society of Chemistry journal article supplement (doi:10.1039/c5qi00098j), 2015-01-01
Supplement: c5qi00098j1.pdf [file c5qi00098j1.pdf]

# Supporting Information for

## Single-molecule magnet involving strong exchange coupling in terbium(III) complex with 2,2'-bipyridin-6-yl *tert*-butyl nitroxide

Takuya Kanetomo,<sup>a</sup> Shunsuke Yoshii,<sup>b</sup> Hiroyuki Nojiri<sup>b</sup> and Takayuki Ishida<sup>\*a</sup>

<sup>a</sup>Department of Engineering Science, The University of Electro-Communications, Chofu, Tokyo 182-8585, Japan

<sup>b</sup>Institute of Materials Research, Tohoku University, Sendai 980-8577, Japan

\*Corresponding author. Tel.: +81 42 443 5490; fax.: +81 42 443 5501. E-mail address: takayuki.ishida@uec.ac.jp

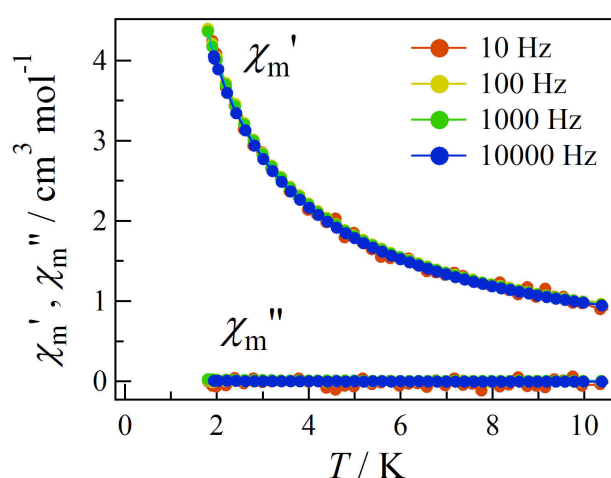

**Figure S1.** Ac magnetic susceptibilities for **Dy-2pyNO** without any applied dc bias field. Note that isomorphous **Tb-2pyNO** showed frequency dependence of  $\chi'$  and  $\chi''$  under the same experimental conditions. See: R. Murakami, T. Ishida, S. Yoshii and H. Nojiri, *Dalton Trans.*, 2013, **42**, 1396.

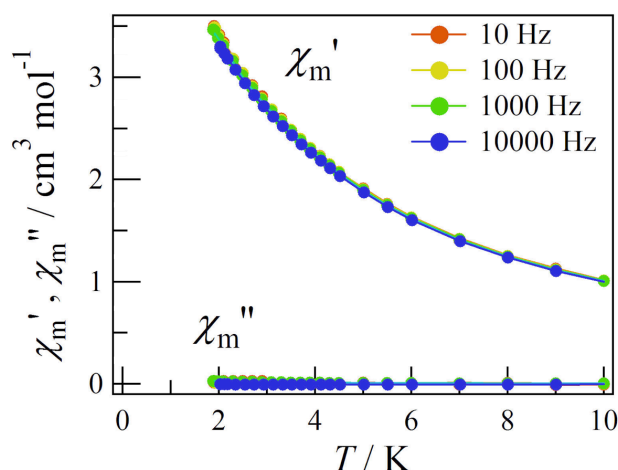

**Figure S2.** Ac magnetic susceptibilities for **Dy-6bpyNO** at an applied dc bias field of 2000 Oe. The experimental conditions are the same as those of Figures 5b and 5d.
